# Supplementary material for: Manganese Deficiency Is Required for High Itaconic Acid Production From D-Xylose in Aspergillus terreus
Source: PubMed Central journal article supplement (PMC6629873; doi:10.3389/fmicb.2019.01589), 2019-07-09
Supplement: Data_Sheet_1.pdf [file Data_Sheet_1.pdf]

## *Supplementary Material*

### **Manganese deficiency is required for high itaconic acid production from D-xylose in *Aspergillus terreus***

**István S. Kolláth<sup>1</sup>, Ákos P. Molnár<sup>1</sup>, Áron Soós<sup>2</sup>, Erzsébet Fekete<sup>1</sup>, Erzsébet Sándor<sup>2</sup>, Béla Kovács<sup>2</sup>, Christian P. Kubicek<sup>3</sup> and Levente Karaffa<sup>1\*</sup>**

<sup>1</sup>Department of Biochemical Engineering, Faculty of Science and Technology, University of Debrecen, Debrecen, Hungary

<sup>2</sup>Institute of Food Science, Faculty of Agricultural and Food Science and Environmental Management, University of Debrecen, Debrecen, Hungary

<sup>3</sup>Institute of Chemical, Environmental & Bioscience Engineering, TU Wien, Vienna, Austria

**\* Correspondence:**

Dr. Levente Karaffa  
levente.karaffa@science.unideb.hu

**Supplementary Table 1.** Specific respiration rates ( $\mu\text{M min}^{-1} \text{g}_{\text{DCW}}^{-1}$ ) of *Aspergillus terreus* NRRL 1960 cultures grown in 500-mL shake-flasks and 2-L bioreactors (fermentors) in IA-producing minimal medium with 1, 5 and 11% (w/v) initial D-xylose as the sole carbon source. Samples for assays were taken at the rapid growth and the stationary phase.  $\text{Mn}^{2+}$  concentrations were below  $3 \mu\text{g/L}^{-1}$  in all cases.

| Initial D-xylose<br>(g L <sup>-1</sup> ) | Shake-flask cultures  |                  | Bioreactor cultures   |                  |
|------------------------------------------|-----------------------|------------------|-----------------------|------------------|
|                                          | rapid growth<br>phase | stationary phase | rapid growth<br>phase | stationary phase |
| 9.9 ± 0.8                                | 28.6 ± 1.0            | 10.2 ± 0.8       | 29.1 ± 1.1            | 9.6 ± 1.1        |
| 51.1 ± 1.4                               | 28.1 ± 1.3            | 9.3 ± 0.7        | 27.4 ± 1.2            | 10.2 ± 1.0       |
| 110.1 ± 0.9                              | 29.6 ± 1.5            | 9.9 ± 1.0        | 30.4 ± 1.6            | 10.6 ± 1.3       |
